# Supplementary material for: Antibody Binding Captures High Energy State of an Antigen: The Case of Nsp1 SARS-CoV-2 as Revealed by Hydrogen–Deuterium Exchange Mass Spectrometry
Source: MDPI journal article supplement (doi:10.3390/ijms242417342), 2023-12-11
Supplement: s1 [file s1]

## Supplementary Information

# **Antibody Binding Captures High Energy State of an Antigen: The Case of Nsp1 SARS-CoV-2 as Revealed by Hydrogen-Deuterium Exchange Mass Spectrometry**

**Ravi Kant<sup>1,2</sup>, Nawneet Mishra<sup>3</sup>, Michael L. Gross<sup>2\*</sup>**

<sup>1</sup>University School of Biotechnology, Guru Gobind Singh Indraprastha University, Dwarka, Delhi, 110078, India

<sup>2</sup>Department of Chemistry, Washington University, St Louis, MO 63130, USA.

<sup>3</sup>Department of Pathology and Immunology, Washington University School of Medicine in St Louis, St Louis, MO 63110, USA.

\* Correspondence: [mgross@wustl.edu](mailto:mgross@wustl.edu)

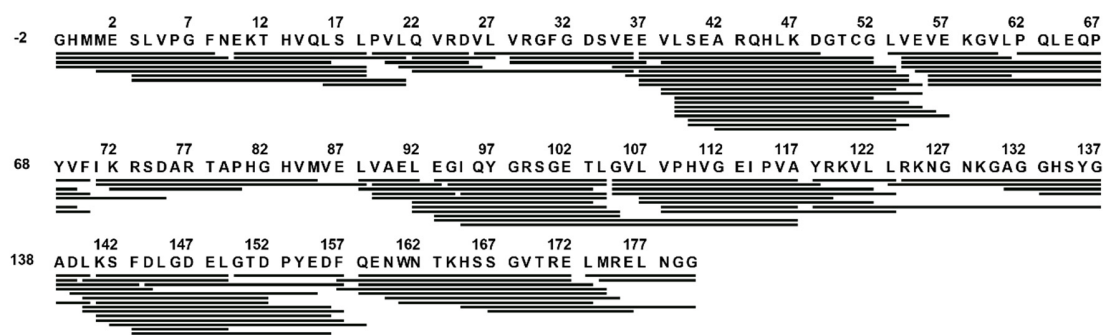

Figure S1. Coverage map of all peptides obtained for the LukF after double digestion, Fungal XIII followed by pepsin. The horizontal bar represents peptides spanning different segments

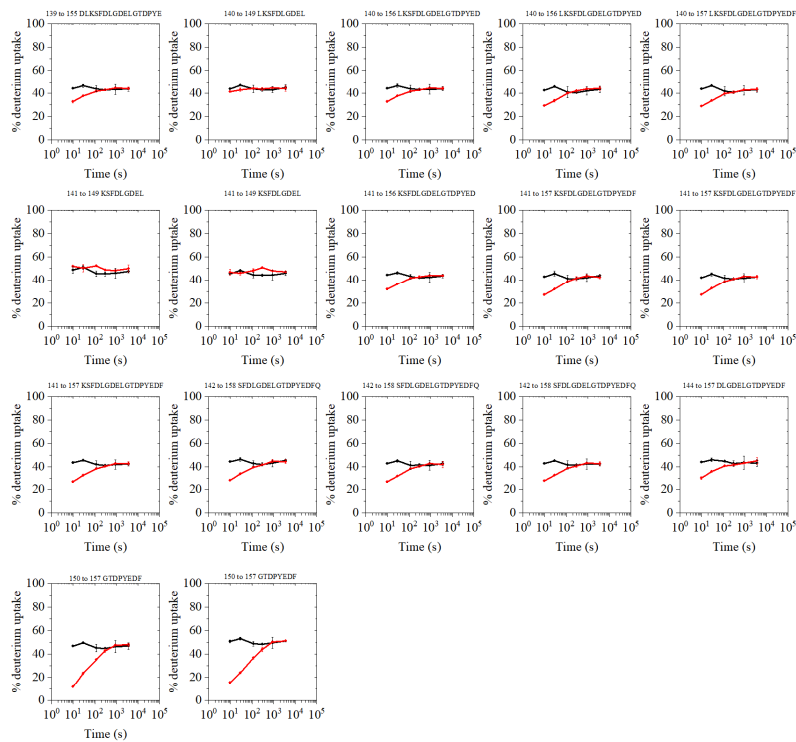

Figure S2. HDX kinetics curves of peptides exhibiting HDX differences from the putative binding site towards the C-terminus of full length Nsp1: unbound (black) and antibody-bound (15497).

1    5    10    15    20    25    30    35    40    45    50    55    60    65    70  
 EI SEV QLVES GGGLV QPGGS LRLSC AASGF NFSSS SI HWV RQAPG KGLEW VASI S SSYGY TYYAD SVKGR  
 71    75    80    85    90    95    100    105    110    115    120    125    130    135    140  
 FTI SA DTSKN TAYLQ MNSLR AEDTA VYYCA RWAAM DYWGQ GTLVT VSSAS TKGPS VFPLA PSSKS TSGGT  
 141    145    150    155    160    165    170    175    180    185    190    195    200    205    210  
 AALGC LVKDY FPEPV TVSWN SGALT SGVHT FPAVL QSSGL YSLSS VVTVP SSSLG TQTYI CNVNH KPSNT  
 211    215    220  
 KVDKK VEPKS

A

1    5    10    15    20    25    30    35    40    45    50    55    60    65    70  
 DI QMT QSPSS LSASV GDRV T I TCRA SQSVS SAVAW YQQKP GKAPK LLI YS ASSLY SGVPS RFSGS RSGTD  
 71    75    80    85    90    95    100    105    110    115    120    125    130    135    140  
 FTLTI SSLQP EDFAT YYCQQ YYS LI TFGQG TKVEI KRTVA APSVF I FPPS DSQLK SGTAS VVCLL NNFYP  
 141    145    150    155    160    165    170    175    180    185    190    195    200    205    210  
 REAKV QWKVD NALQS GNSQE SVTEQ DSKDS TYSL S STLT L SKADY EKHKV YACEV THQGL SSPVT KSFNR  
 211    215    220  
 GE

B

Figure S3. Coverage map of all peptides obtained for the antibody 15497 A) Heavy Chain B) Light chain after double digestion, Fungal XIII followed by pepsin. The horizontal bar represents peptides spanning different segments of the sequence.

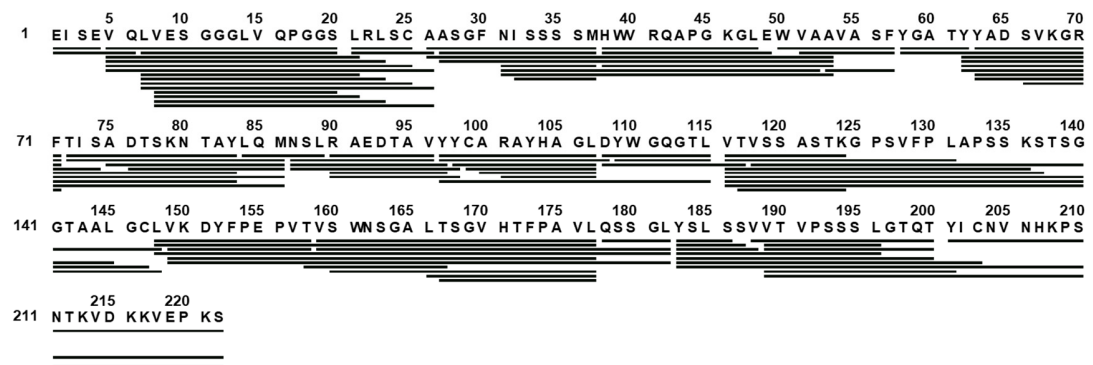

A

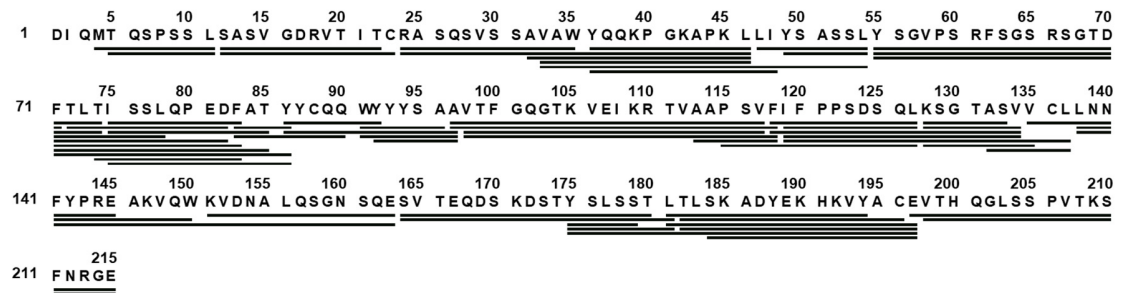

B

Figure S4. Coverage map of all peptides obtained for the antibody 15498 A) Heavy Chain B) Light chain after double digestion, Fungal XIII followed by pepsin. The horizontal bar represents peptides spanning different segments of the sequence.

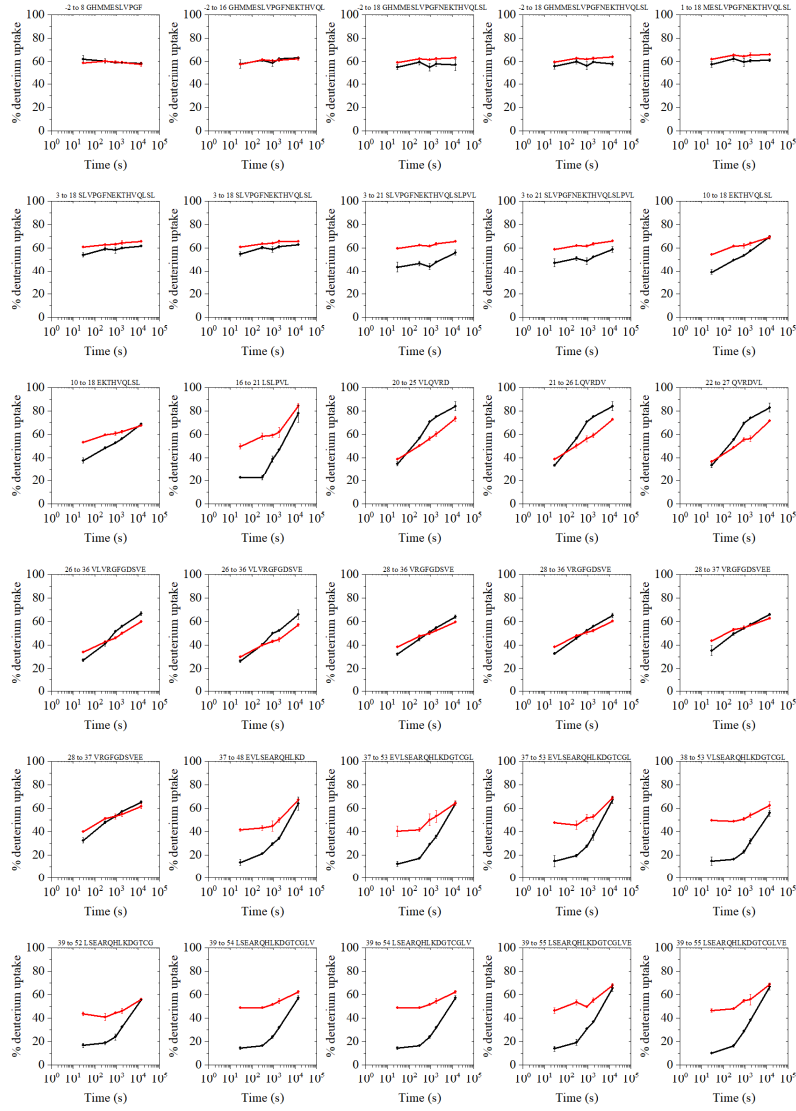

Figure S5. HDX kinetics curves of peptides from N terminal domain of full length Nsp1, unbound (black), bound to antibody (15498).

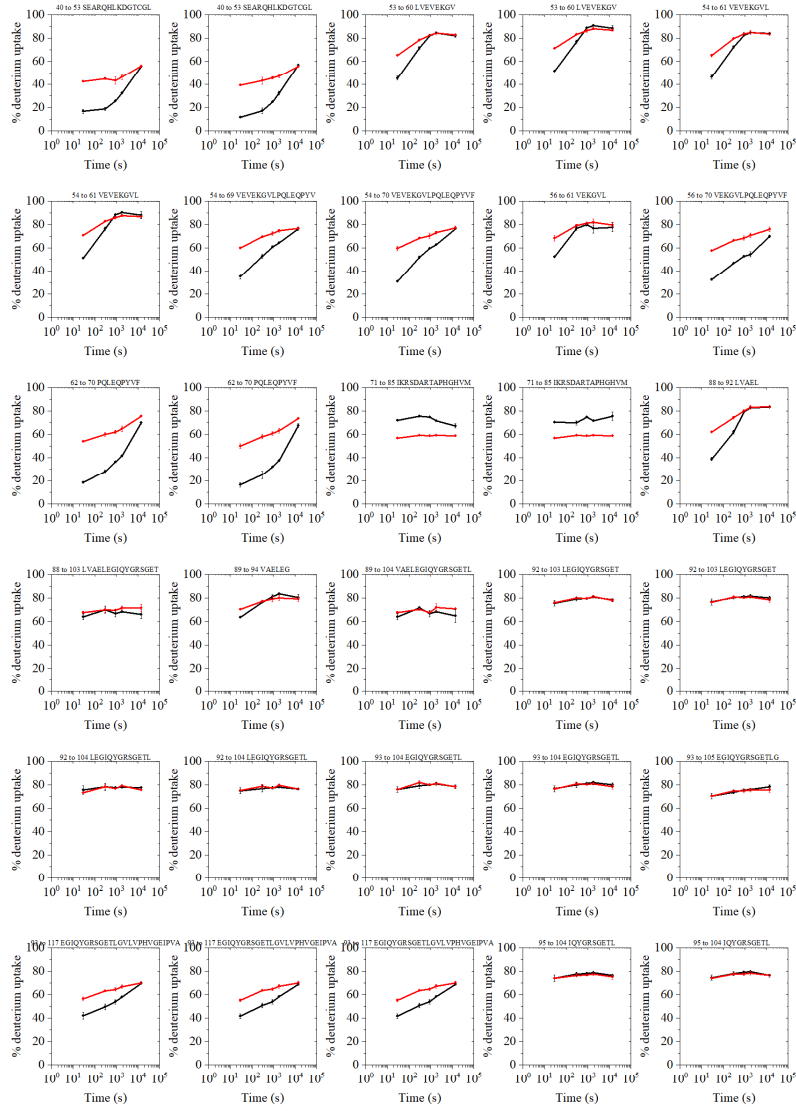

Figure S5. HDX kinetics curves of peptides from N terminal domain of full length Nsp1, unbound (black), bound to antibody (15498).

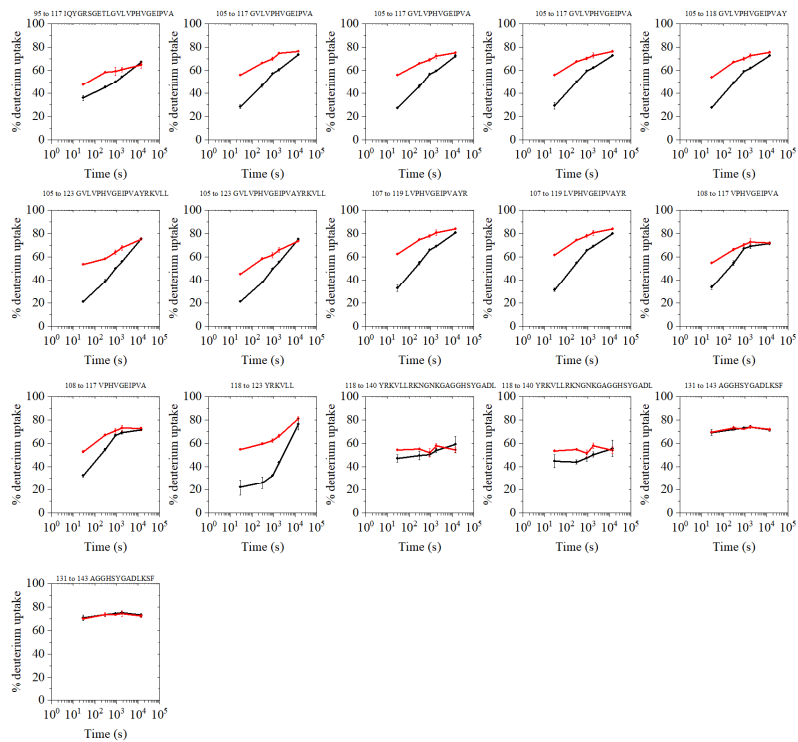

Figure S5. HDX kinetics curves of peptides from N terminal domain of full length Nsp1, unbound (black), bound to antibody (15498).
